# Supplementary material
Source: PubMed Central journal article supplement (PMC3221807)
Supplement: NIHMS319515-supplement-1_si_001.pdf [file NIHMS319515-supplement-1_si_001.pdf]

# Supplemental Information

**Polyamines are traps for reactive intermediates in furan metabolism**

Lisa A. Peterson, Martin B. Phillips, Ding Lu, and Mathilde M. Sullivan

**Supplemental Table 1.**  
 Ion-suppression correction factors for LC/MS analyses.

| Amine                            | Water | Buffer | Media |
|----------------------------------|-------|--------|-------|
| GSH-BDA-putrescine               | 0.92  | 0.82   | 0.86  |
| GSH-BDA-cadaverine               | 0.67  | 0.59   | 0.63  |
| GSH-BDA- $N^{\alpha}$ -ornithine | 1.62  | 9.17   | 1.91  |
| GSH-BDA- $N^{\delta}$ -ornithine | 1.09  | 1.03   | 1.02  |
| GSH-BDA-spermine                 | 2.09  | 2.70   | 2.61  |
| GSH-BDA- $N^1$ -spermidine       | 0.83  | 0.85   | 0.87  |
| GSH-BDA- $N^8$ -spermidine       | 0.93  | 0.83   | 0.92  |
| GSH-BDA- $N^{\alpha}$ -lysine    | 1.09  | 1.06   | 1.04  |
| GSH-BDA- $N^{\epsilon}$ -lysine  | 0.83  | 0.76   | 0.86  |

**A.**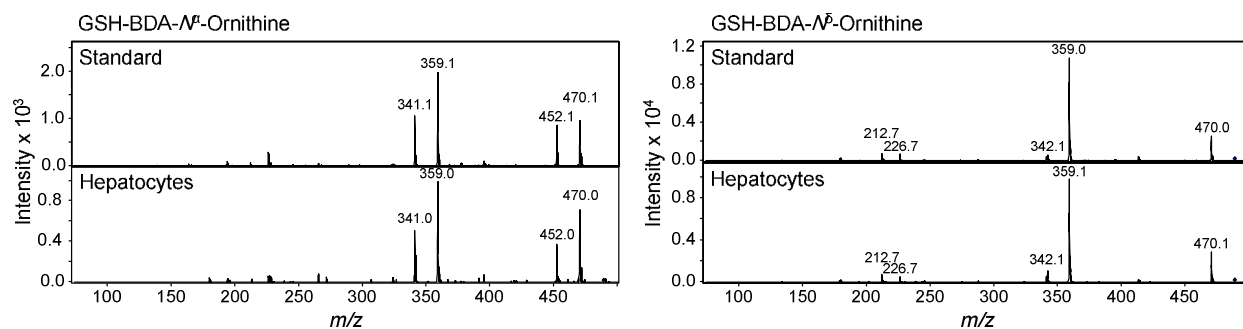**B.**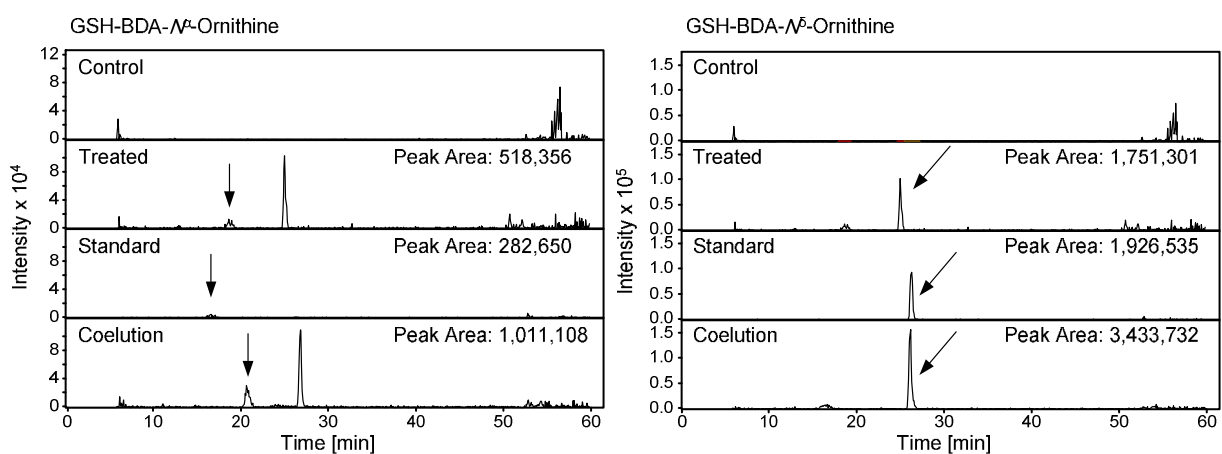

Supplemental Figure 1. A. Mass spectra of GSH-BDA- $N^{\alpha}$ -ornithine and GSH-BDA- $N^{\delta}$ -ornithine. B. LC/MS chromatograms demonstrating co-elution of the synthetic GSH-BDA-ornithine isomers with the hepatocyte metabolites of furan. The mixtures were eluted from the HPLC column with the following gradient: after ten minutes in 10 mM ammonium formate, pH 2.8, a 16 minute linear gradient was run to 10 mM ammonium formate, pH 2.8, containing 12.5% acetonitrile followed by a 10 minute linear gradient to 25% acetonitrile.

**A**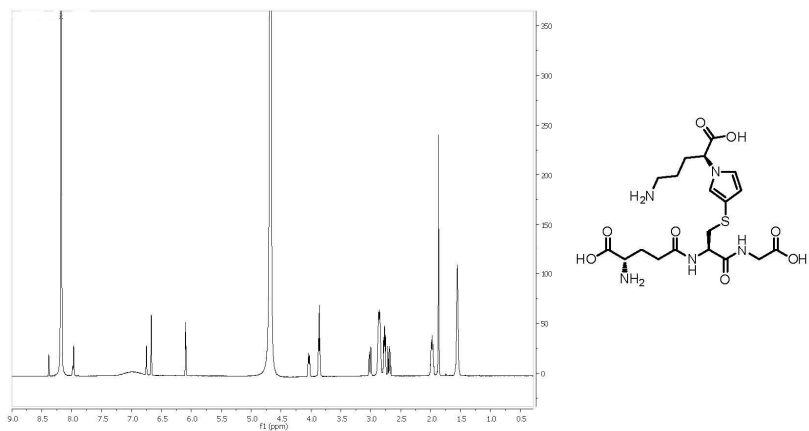**B**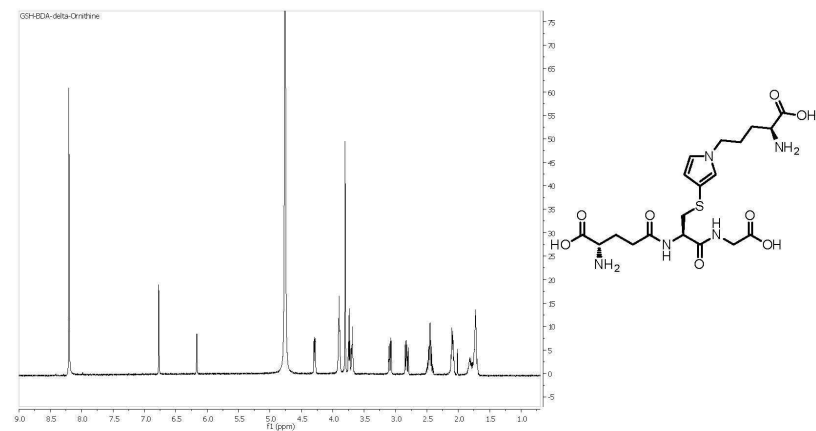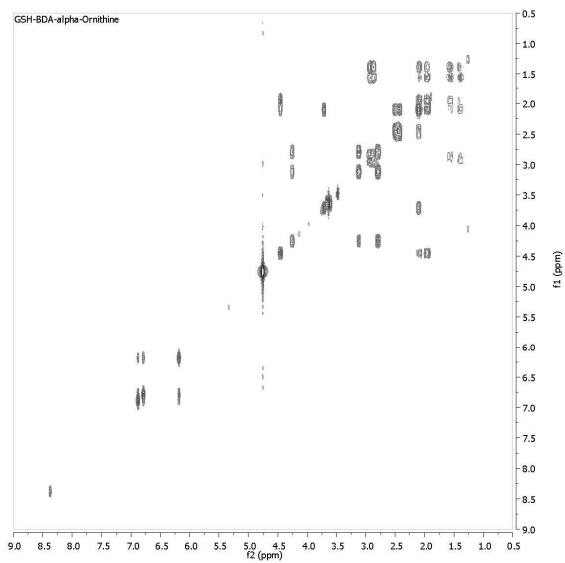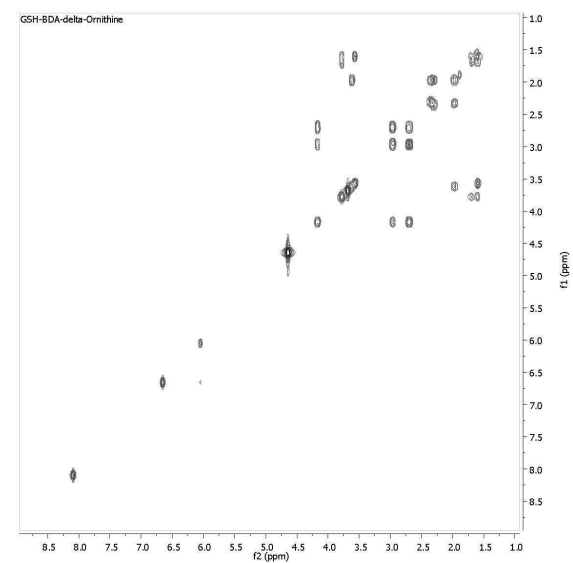

Supplemental Figure 2. COSY NMR spectra for A) GSH-BDA-*N*<sup>α</sup>-ornithine and B) GSH-BDA-*N*<sup>δ</sup>-ornithine. The C2 proton of the pyridine ring in both compounds exchanged rapidly with D<sub>2</sub>O.

**A.**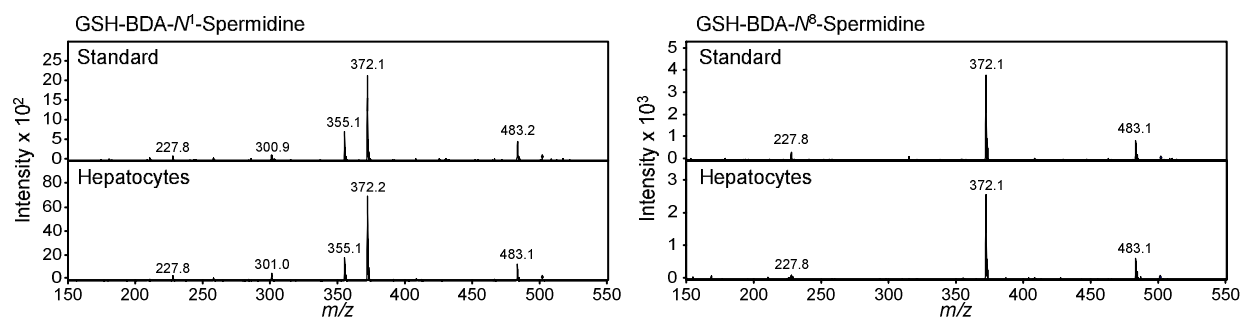**B.**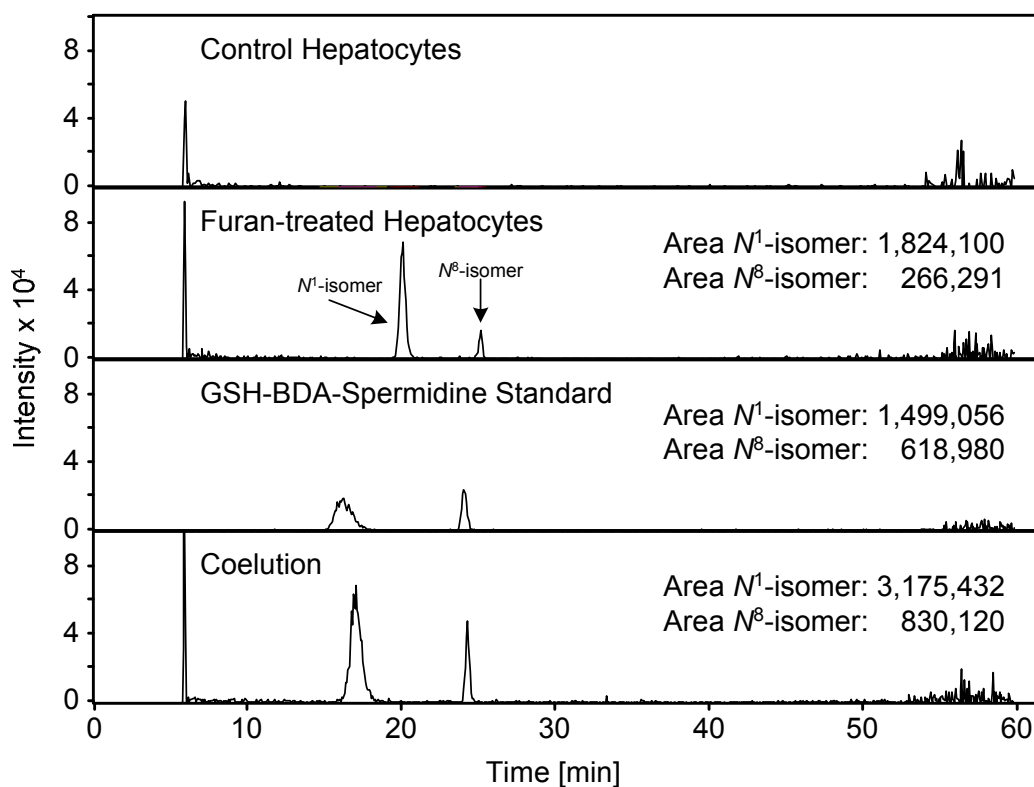

Supplemental Figure 3. A. Mass spectra of GSH-BDA-*N*<sup>1</sup>-spermidine and GSH-BDA-*N*<sup>8</sup>-spermidine. B. LC/MS chromatograms demonstrating co-elution of the synthetic GSH-BDA-spermidine isomers with the hepatocyte metabolites of furan. The mixtures were eluted from the HPLC column with the following gradient: after ten minutes in 10 mM ammonium formate, pH 2.8, a 16 minute linear gradient was run to 10 mM ammonium formate, pH 2.8, containing 12.5% acetonitrile followed by a 10 minute linear gradient to 25% acetonitrile.

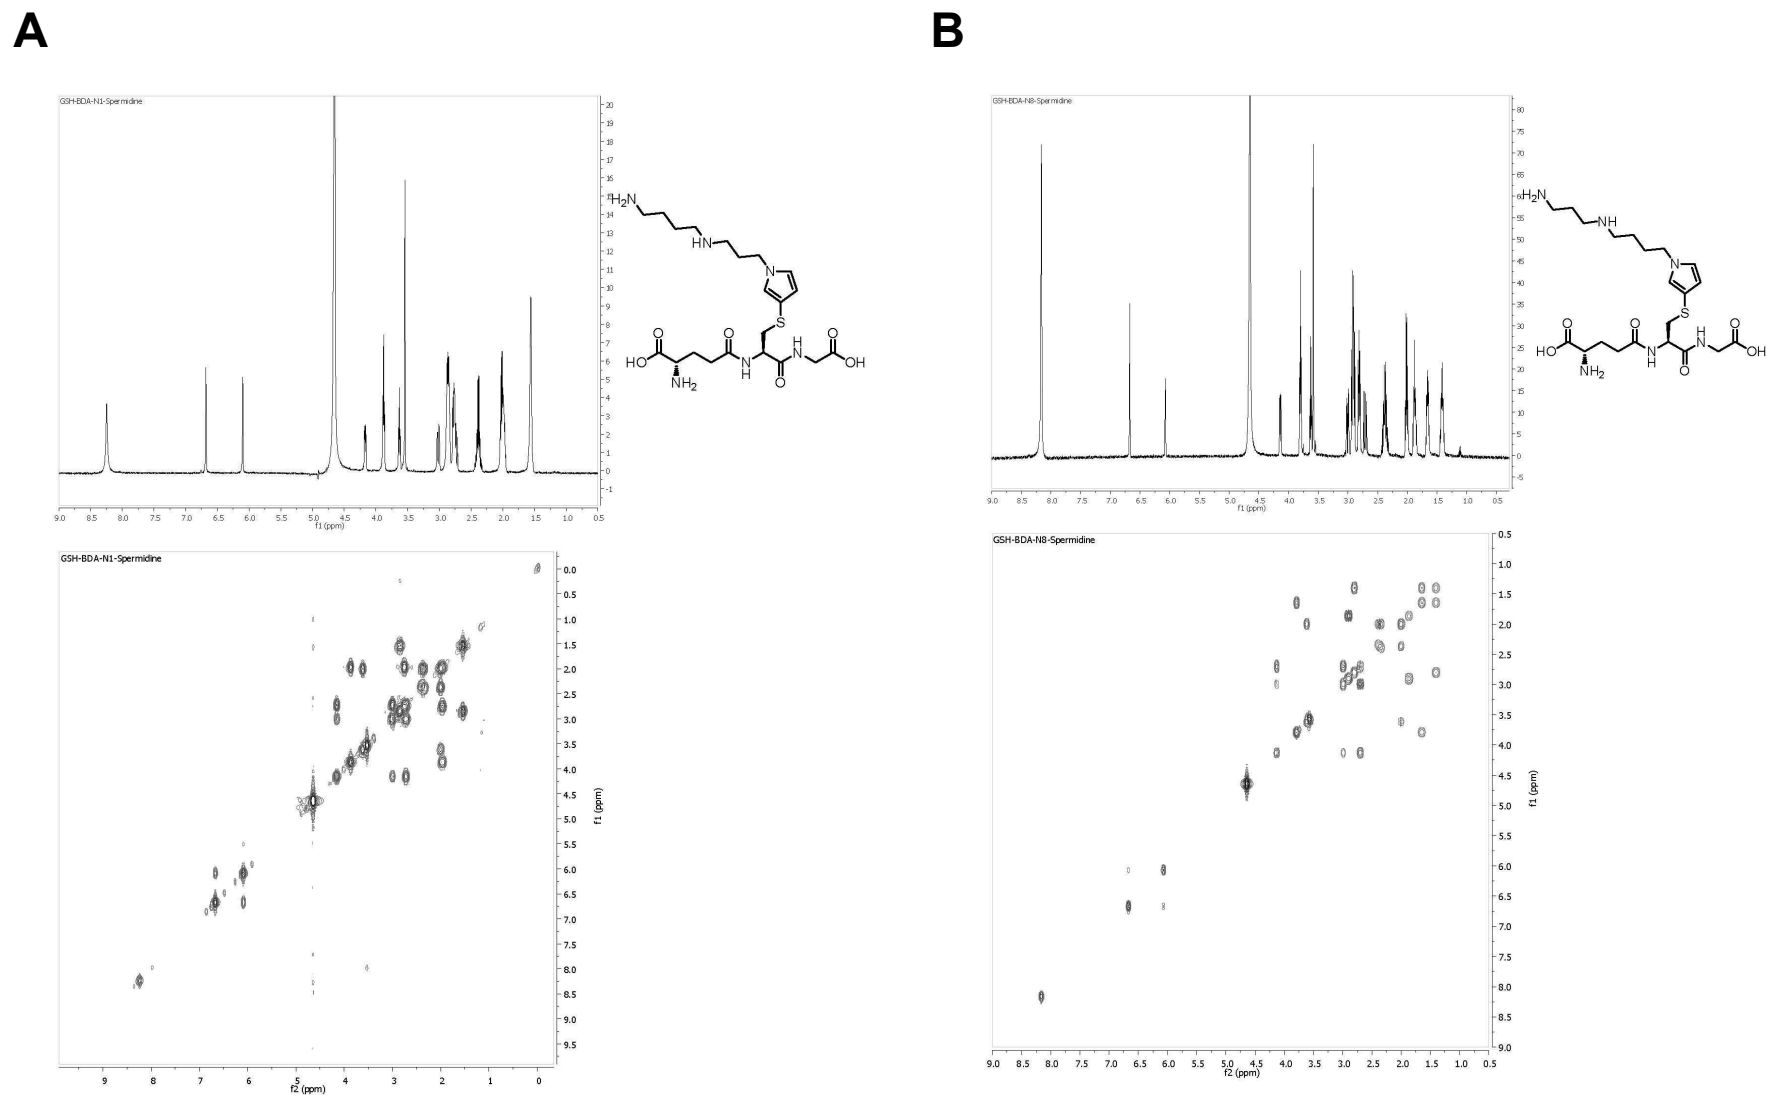

Supplemental Figure 4. COSY NMR of A) GSH-BDA-*N*<sup>1</sup>-spermidine and B) GSH-BDA-*N*<sup>8</sup>-spermidine. The C2 proton of the pyridine ring in both compounds exchanged rapidly with D<sub>2</sub>O.

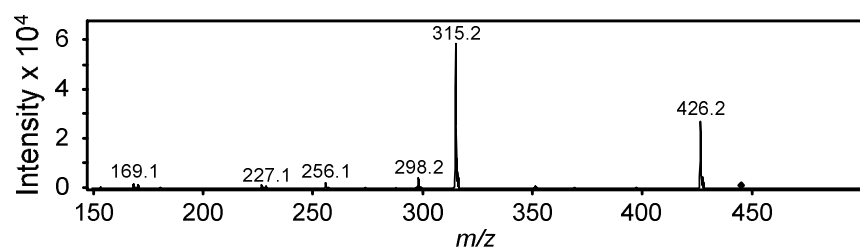

Supplemental Figure 5. Mass spectrum of synthetic GSH-BDA-putrescine.

**A.**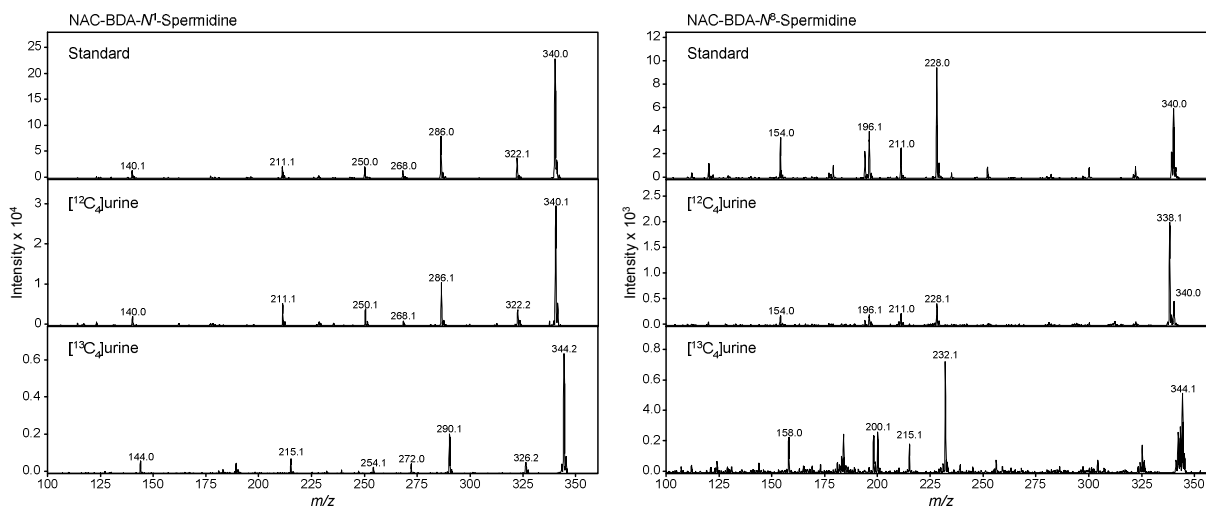**B.**NAC-BDA-*N*<sup>1</sup>-spermidineUrine from [<sup>12</sup>C<sub>4</sub>]- and [<sup>13</sup>C<sub>4</sub>]furan-treated rats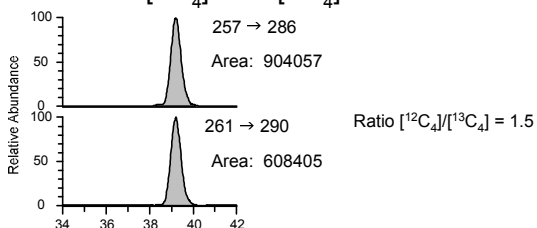

Standard alone

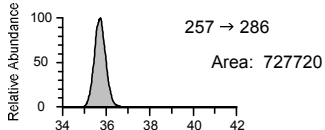

Co-elution of standard with urine

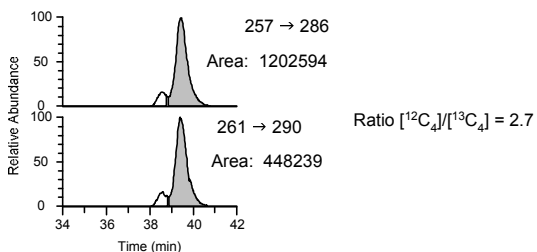NAC-BDA-*N*<sup>8</sup>-spermidineUrine from [<sup>12</sup>C<sub>4</sub>]- and [<sup>13</sup>C<sub>4</sub>]furan-treated rats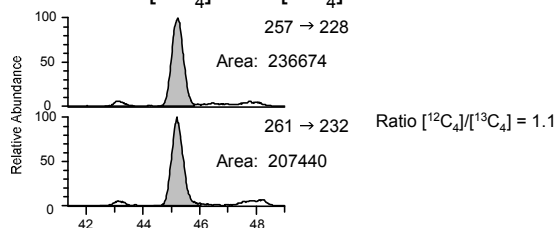

Standard alone

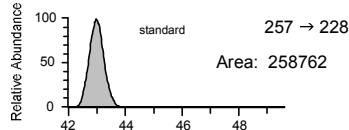

Co-elution of standard with urine

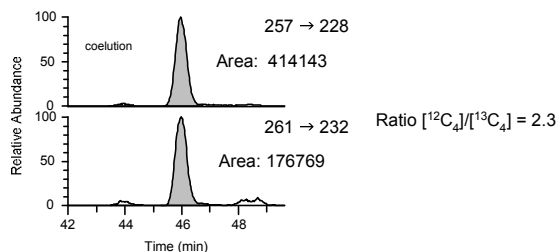

Supplemental Figure 6. A. Mass spectrum for the NAC-BDA-spermidine standards and metabolites observed in urine from [<sup>12</sup>C<sub>4</sub>]- and [<sup>13</sup>C<sub>4</sub>]furan-treated rats. The fragment at *m/z* 338 in the mass spectrum for the urinary metabolite, [<sup>12</sup>C<sub>4</sub>]NAC-BDA-*N*<sup>8</sup>-spermidine, is from a co-eluting peak that also has a molecular ion at *m/z* 357. B. LC/MS chromatograms obtained with a mixture of urine from [<sup>12</sup>C<sub>4</sub>]- and [<sup>13</sup>C<sub>4</sub>]furan-treated rats demonstrating co-elution of these metabolites with the synthetic standards of the NAC-BDA-spermidine isomers. HPLC method 1



was employed using 10 mM ammonium formate, pH 2.8.
